# Supplementary material
Source: PubMed Central journal article supplement (PMC3515699)
Supplement: NIHMS421476-supplement-Supp_Data.pdf [file NIHMS421476-supplement-Supp_Data.pdf]

## Supporting Information

### **Dissection of Hydrogen Bond Interaction Network around an Iron-sulfur Cluster by Site-specific Isotope Labeling of Hyperthermophilic Archaeal Rieske-type Ferredoxin**

Toshio Iwasaki,<sup>\*,†</sup> Risako Fukazawa,<sup>†</sup> Yoshiharu Miyajima-Nakano,<sup>†</sup> Amgalanbaatar Baldansuren,<sup>‡</sup> Shinichi Matsushita,<sup>†</sup> Myat T. Lin,<sup>§</sup> Robert B. Gennis,<sup>§</sup> Kazuya Hasegawa,<sup>¶</sup> Takashi Kumasaka,<sup>¶</sup> and Sergei A. Dikanov<sup>\*,‡</sup>

**Table S1. PCR primers used for construction of new BL21(DE3) strain RF4RIL**

| PCR primers             | Purpose                 | Oligonucleotide sequences (5'→3')                          | from <sup>a</sup> | to <sup>a</sup> |
|-------------------------|-------------------------|------------------------------------------------------------|-------------------|-----------------|
| aspC UpF                | Up.F                    | ATGAACGCCTGCATAATCCCTTCTCTGC                               | 989332            | 989358          |
| aspC UpR <sup>b</sup>   | Up.R                    | CTTCGAAGCAGCTCCAGCCTACACGCATTAATAACAATGAAGCCCGC            | 989580            | 989602          |
| aspC DownF <sup>c</sup> | Down.F                  | GGAATAGGAACTAAGGAGGATATTCATATGGACGAGGTTCCATTATGGTTACAGAAGG | 990794            | 990821          |
| aspC DownR              | Down.R                  | GTCCGTCCATCGCTTACACCAAATCTAAAG                             | 991163            | 991192          |
| aspC ext.F <sup>d</sup> | deletion of <i>aspC</i> | TTGATGACAGCGGCCTGACACTGATGCAG                              | 988858            | 988886          |
| aspC ext.R <sup>d</sup> | deletion of <i>aspC</i> | ACTCCAACCTCTTTGGTCTGGTTGATGG                               | 991552            | 991579          |
| tyrB UpF                | Up.F                    | GCGAACGTGATACCCGCTTGGCGTAGTC                               | 4173966           | 4173994         |
| tyrB UpR <sup>e</sup>   | Up.R                    | GAACCTCGAAGCAGCTCCAGCCTACACGCGATGGTTCTCCAGGTTTACGGGCAG     | 4174490           | 4174516         |
| tyrB DownF <sup>f</sup> | Down.F                  | GGAATAGGAACTAAGGAGGATATTCATATGTGCAGGAAAGCAGGCTGGAG         | 4175711           | 4175730         |
| tyrB DownR              | Down.F                  | TGCCGAGGAGGTTAAAGGTGATTATTC                                | 4176130           | 4176156         |
| tyrB ext.F <sup>d</sup> | deletion of <i>tyrB</i> | GCGAAGGCAAACCTGGTCAACGTTC                                  | 4173729           | 4173754         |
| tyrB ext.R <sup>d</sup> | deletion of <i>tyrB</i> | GATTGACCAGCCCCCTACCTACAATGG                                | 4176451           | 4176478         |

<sup>a</sup> Positions in the genomic sequence of BL21(DE3) strain (NCBI GenBank code, AM946981). *aspC*, 989603-990793; *tyrB*, 4174517-4175710.

<sup>b</sup> This PCR primer consists of the oligonucleotide sequences from the BL21(DE3) *aspC* gene plus flanking region (23 bp) and the kanamycin resistance cassette gene (24 bp) (**Fig. 2**, step 1).

<sup>c</sup> This PCR primer consists of the oligonucleotide sequences from the BL21(DE3) *aspC* gene plus flanking region (28 bp) and the kanamycin resistance cassette gene (30 bp) (**Fig. 2**, step 1).

<sup>d</sup> Used for confirmation of the deletion of target chromosomal genes.

<sup>e</sup> This PCR primer consists of the oligonucleotide sequences from the BL21(DE3) *tyrB* gene plus flanking region (27 bp) and the kanamycin resistance cassette gene (27 bp) (**Fig. 2**, step 1).

<sup>f</sup> This PCR primer consists of the oligonucleotide sequences from the BL21(DE3) *tyrB* gene plus flanking region (20 bp) and the kanamycin resistance cassette gene (30 bp) (**Fig. 2**, step 1).
